# Supplementary material for: Improving the photothermal therapy efficacy and preventing the surface oxidation of bismuth nanoparticles through the formation of a bismuth@bismuth selenide heterostructure
Source: Royal Society of Chemistry journal article supplement (doi:10.1039/d0tb00825g), 2020-01-01
Supplement: d0tb00825g1.pdf [file d0tb00825g1.pdf]

## **Improving Photothermal Therapy Efficacy and Preventing Surface Oxidization of Bismuth Nanoparticles Through Forming Bismuth@Bismuth Selenide Heterostructure**

Bing Li,<sup>a</sup> Yan Cheng,<sup>\*b</sup> Runxiao Zheng,<sup>b</sup> Xiaqing Wu,<sup>b</sup> Fan Qi,<sup>b</sup> Yunyun Wu,<sup>a,b</sup> Yaqing Hu,<sup>a</sup> and Xi Li<sup>\*a</sup>

<sup>a</sup>School of Chemistry and Life Science, Changchun University of Technology, Changchun, Jilin 130012, P. R. China

<sup>b</sup>Laboratory of Chemical Biology, Changchun Institute of Applied Chemistry, Chinese Academy of Sciences, Changchun, Jilin 130022, P. R. China

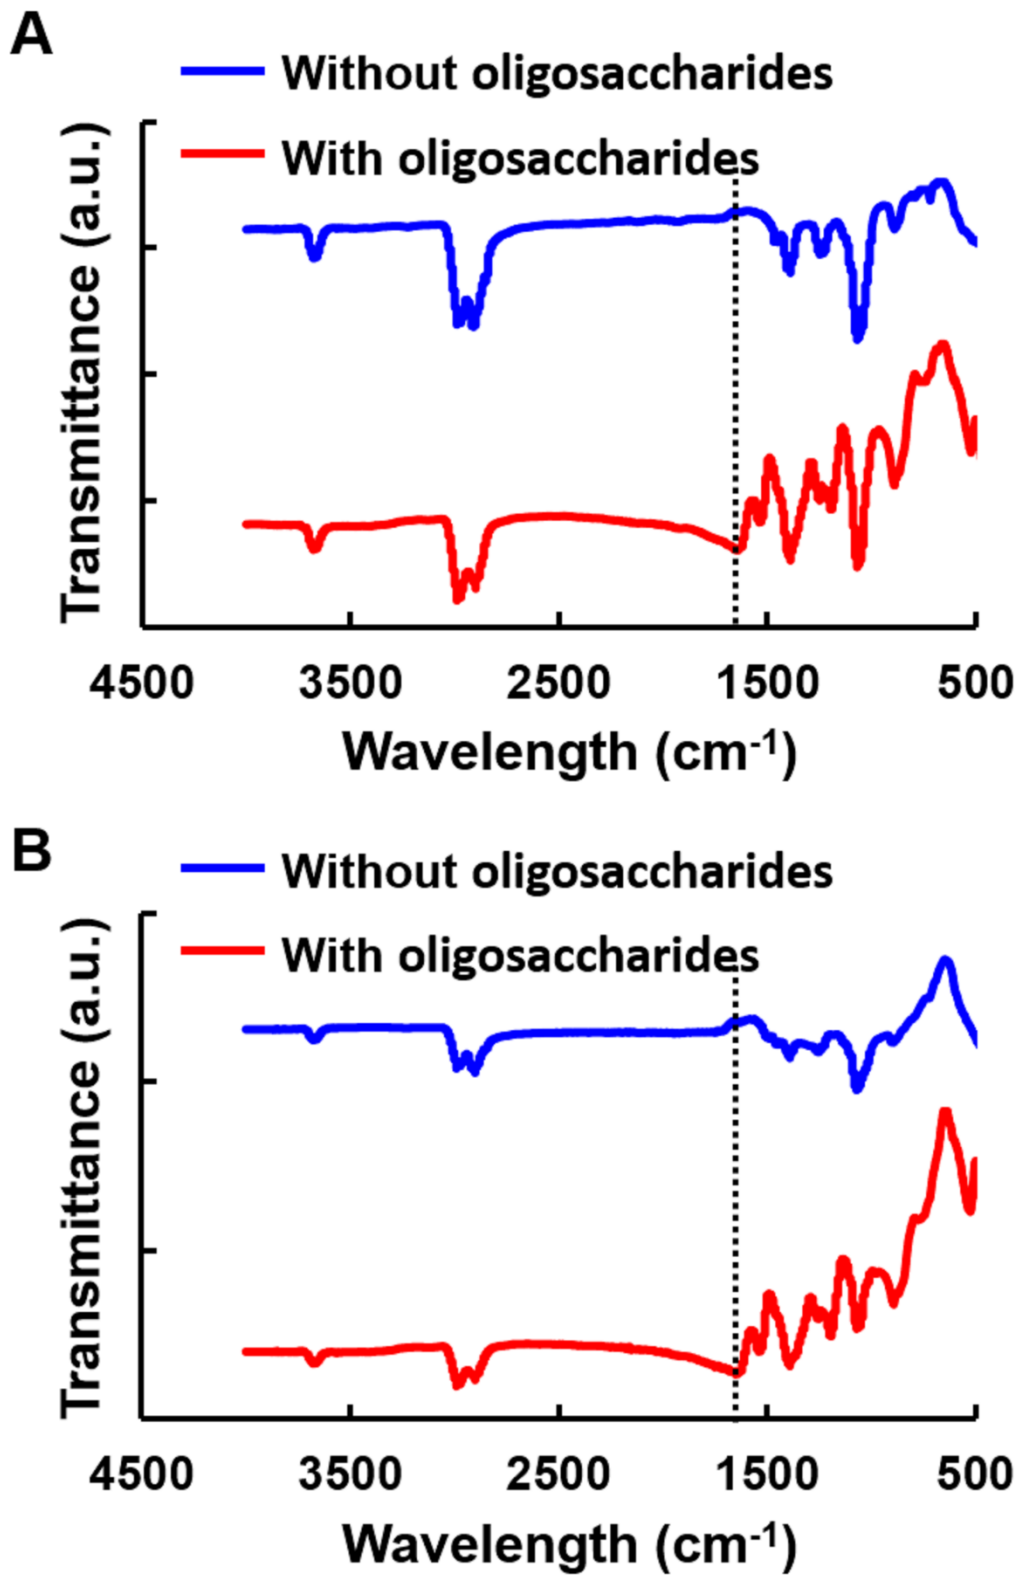

**Figure S1.** FTIR spectra of Bi and Bi@Bi<sub>2</sub>Se<sub>3</sub> NPs with or without oligosaccharides modification.

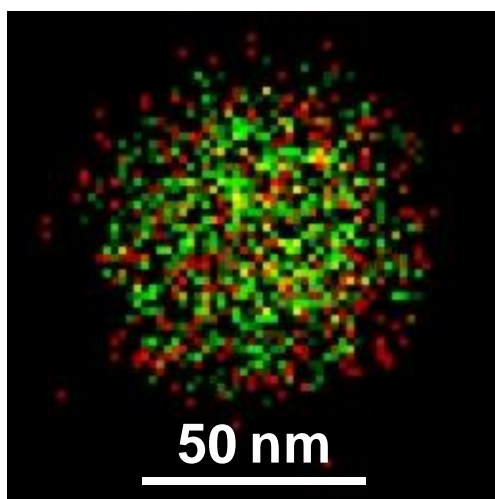

**Figure S2.** EDS analysis of Bi@Bi<sub>2</sub>Se<sub>3</sub> NPs. Bi, green; Se, red.

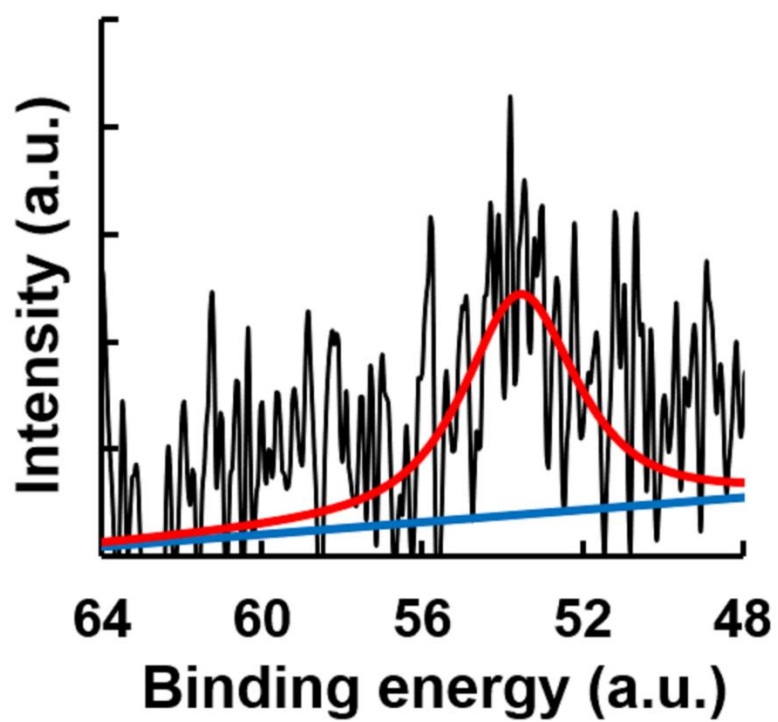

**Figure S3.** Se 3d XPS spectrum of Bi@Bi<sub>2</sub>Se<sub>3</sub> NPs.

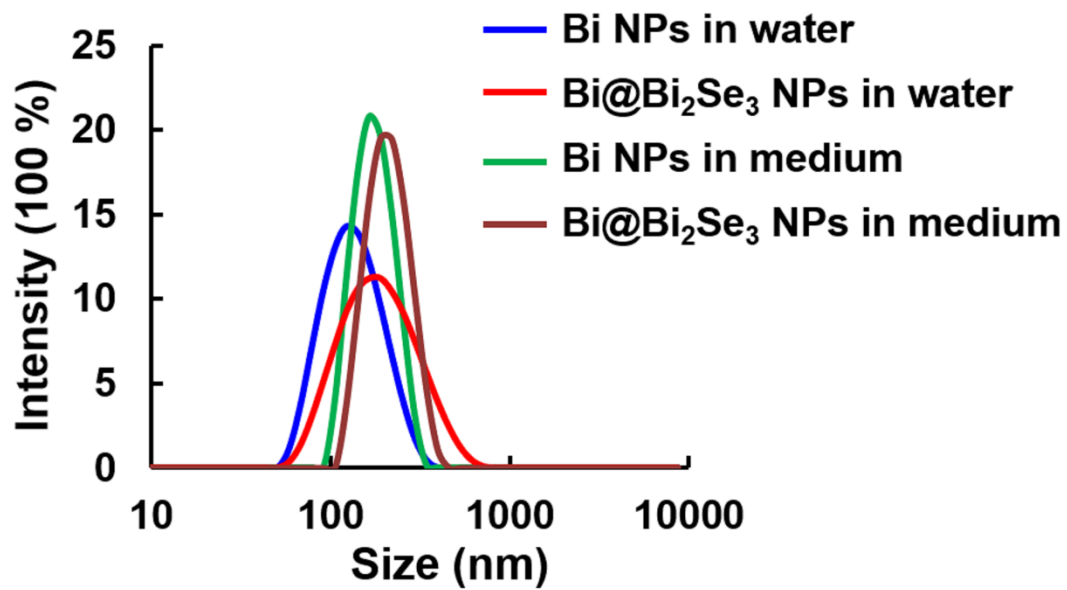

**Figure S4.** Hydrodynamic size of DLS of Bi and Bi@Bi<sub>2</sub>Se<sub>3</sub> NPs in water and DMEM medium.

**A**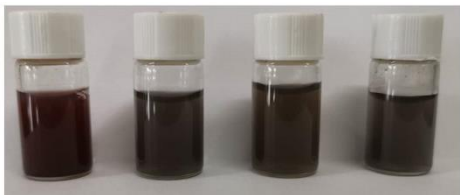**B**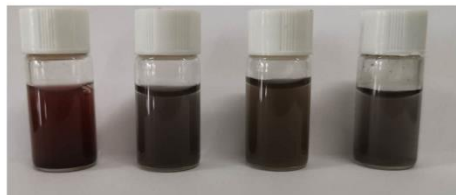

**Figure S5.** The photos of Bi@Bi<sub>2</sub>Se<sub>3</sub> NPs dispersed in four physiological solutions (from left to right, DMEM, H<sub>2</sub>O, PBS and PSF) before (A) and after five days (B).

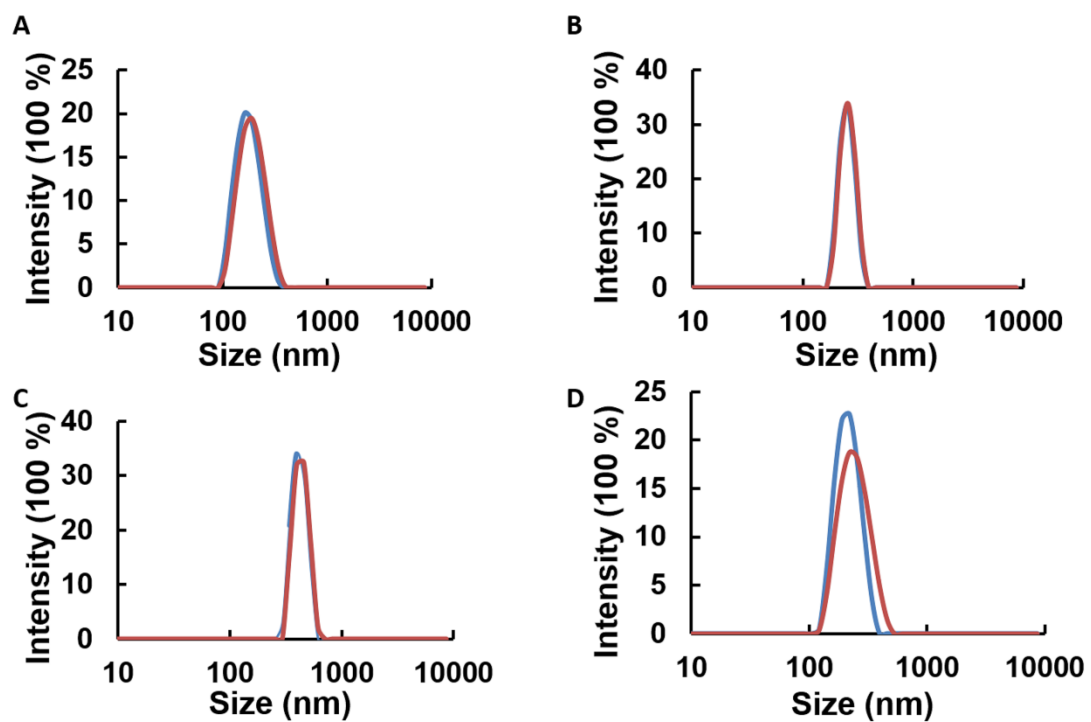

**Figure S6.** The DLS of Bi@Bi<sub>2</sub>Se<sub>3</sub> NPs dispersed in four physiological solutions (H<sub>2</sub>O (A), PBS (B), PSF (C) and DMEM (D) ) before (blue) and after five days (red).

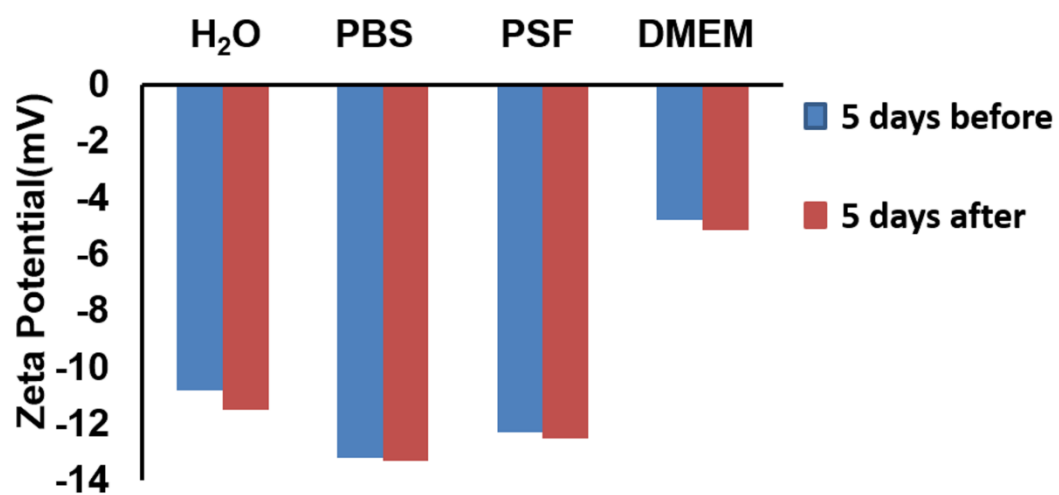

**Figure S7.** The Zeta Potential of Bi@Bi<sub>2</sub>Se<sub>3</sub> NPs dispersed in four physiological solutions (blue) before and (Red) after five days.



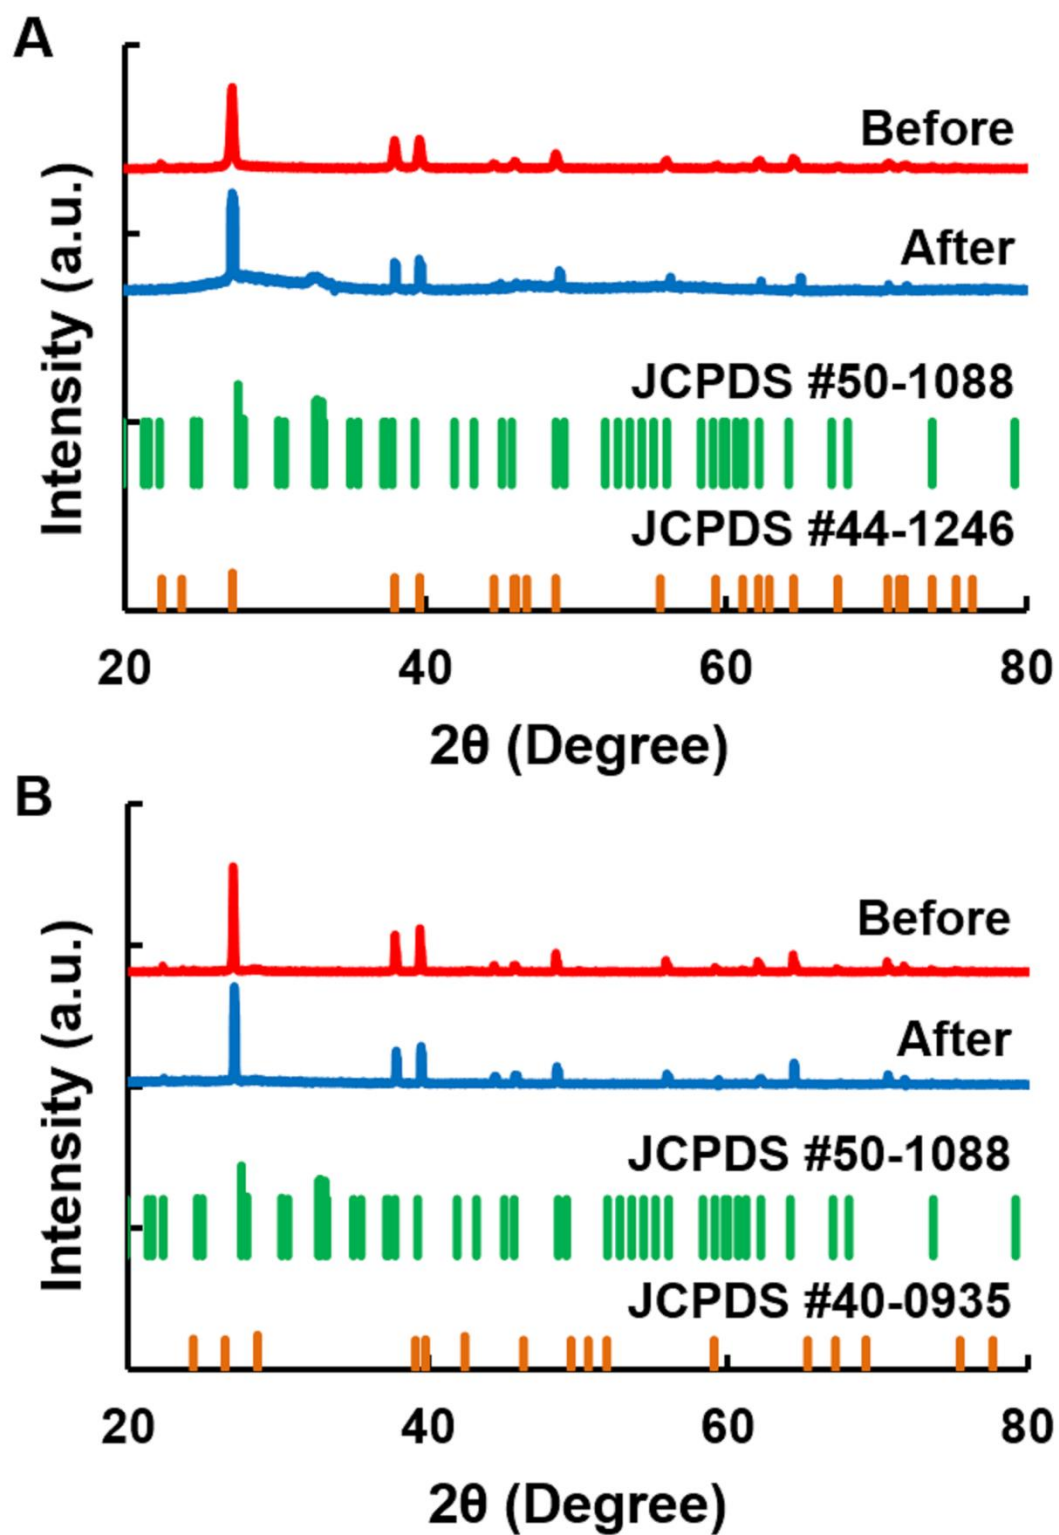

Figure S8. XRD patterns of Bi (A) and Bi@Bi<sub>2</sub>Se<sub>3</sub> (B) NPs before and after storing for a month.

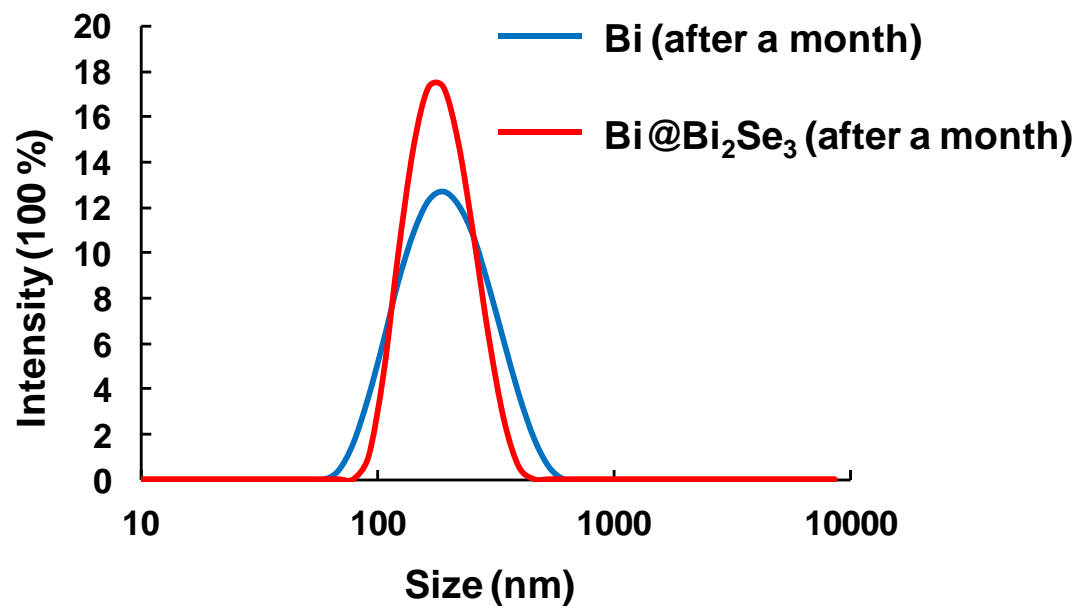

Figure S9. DLS of Bi and Bi@Bi<sub>2</sub>Se<sub>3</sub> NPs after storing for a month.

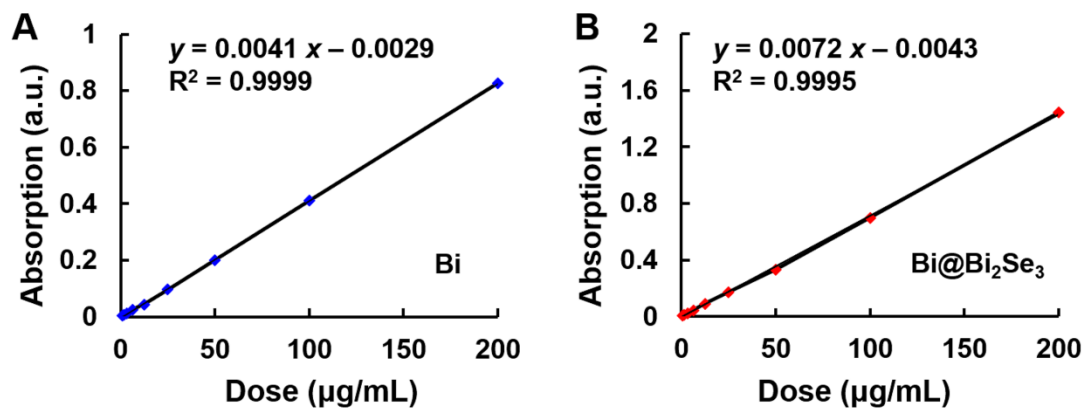

**Figure S10.** The absorption at 808 nm and the corresponding fitting curves of Bi (A) and Bi@Bi<sub>2</sub>Se<sub>3</sub> (B) NP-dispersions at different doses.

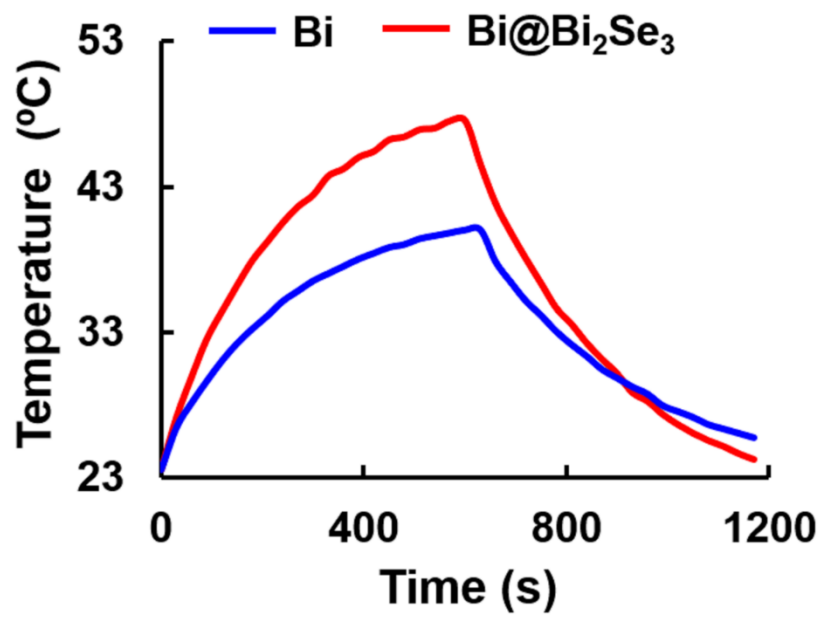

Figure S11. Heating and cooling curves of Bi and Bi@Bi<sub>2</sub>Se<sub>3</sub> NPs.

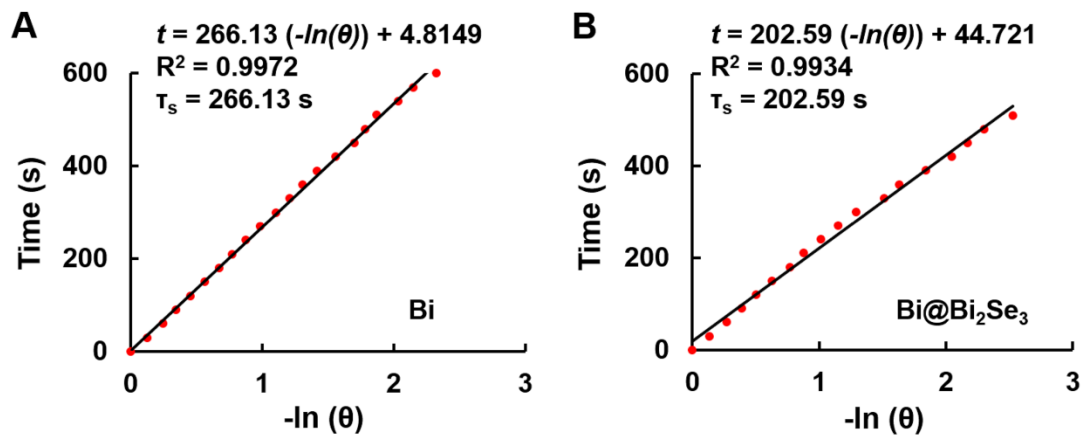

**Figure S12.** Plot and linear fit of time versus negative natural logarithm of the temperature increment for the cooling rate of Bi (A) and Bi@Bi<sub>2</sub>Se<sub>3</sub> NPs (B) aqueous dispersions.

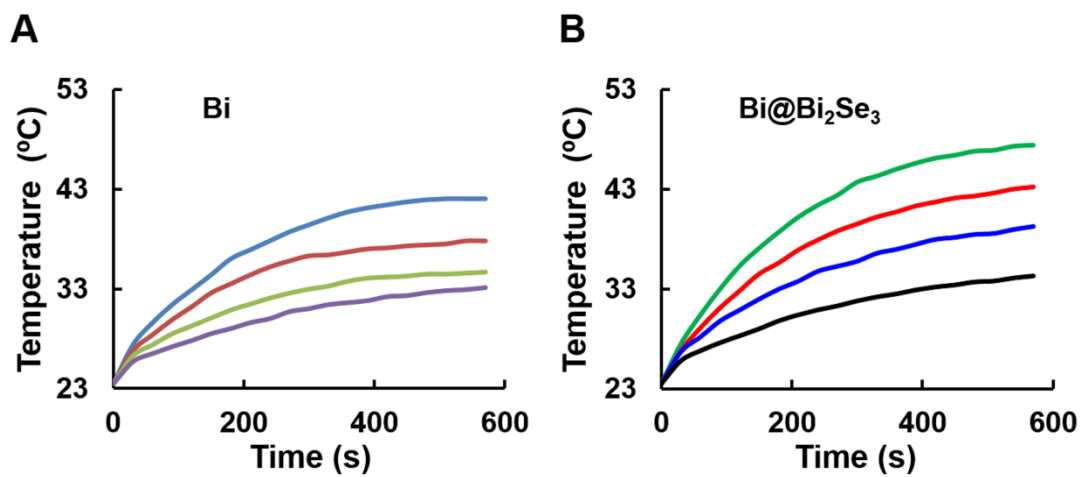

**Figure S13.** Temperature elevation curves of Bi (A) and Bi@Bi<sub>2</sub>Se<sub>3</sub> (B) NPs (25, 50, 100 and 200  $\mu\text{g mL}^{-1}$ ) with 808 nm laser irradiation ( $1 \text{ W cm}^{-2}$ , 10 min).

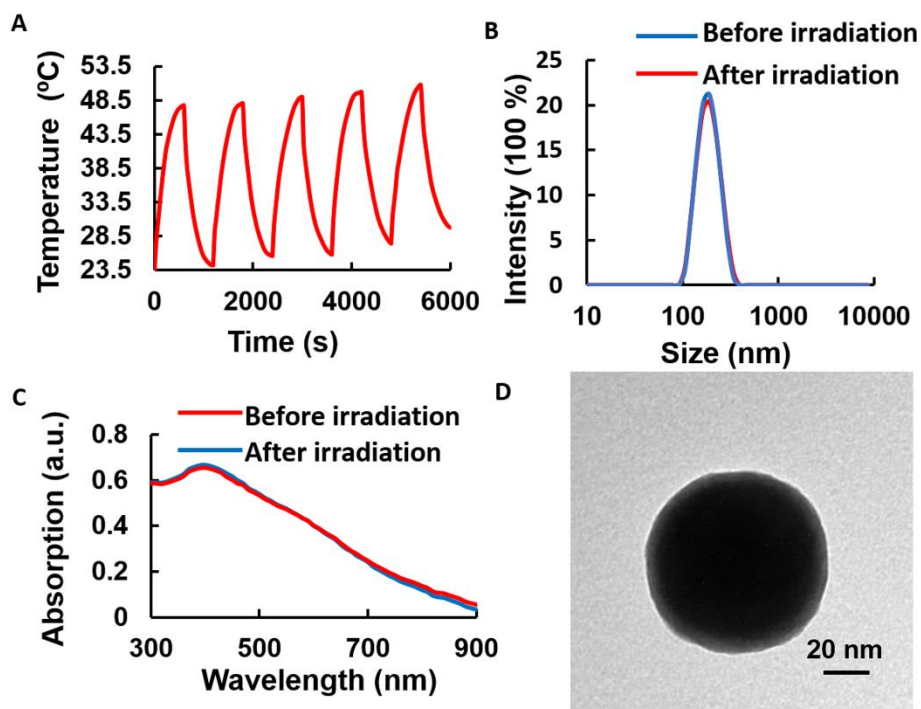

**Figure S14.** The NIR photostability of Bi@Bi<sub>2</sub>Se<sub>3</sub> NPs. (A) The Heating and cooling curves of Bi@Bi<sub>2</sub>Se<sub>3</sub> NPs aqueous dispersions (200 μg mL<sup>-1</sup>) over 5 irradiation cycles. (B-D) DLS (B), UV-Vis spectra (C) and TEM image (D) results of Bi@Bi<sub>2</sub>Se<sub>3</sub> NPs before and after irradiation.
